# Supplementary material for: From manual search to artificial intelligence: A methodological framework for developing patient journey models from electronic health records using natural language processing
Source: Research Square preprint supplement (doi:10.21203/rs.3.rs-7932204/v1), 2025-12-02
Supplement: Supplementary file 1 [file 59700ee7b201be1d4dd407e9.docx]

Supplementary material

**From manual search to artificial intelligence: A methodological framework for developing patient journey models from electronic health records using natural language processing**

Rose Zhang1, Tara Raftery2, Thirupathi Pattipaka3, Petra Nathan4

Fig.S1 Workflow to apply Natural language processing (NLP) for medical notes. SDS structured data storage


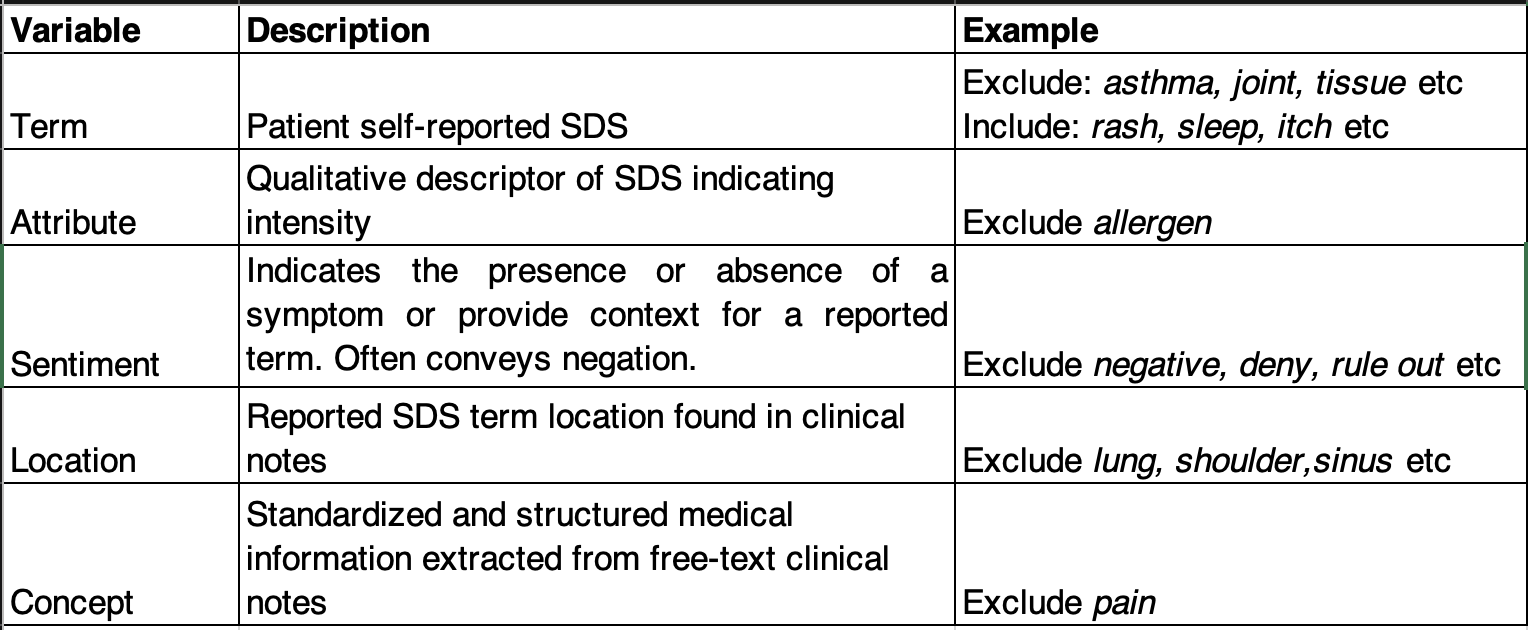


Table S1 Applied variables within to extract unstructured data from HER upon NLP technique.#


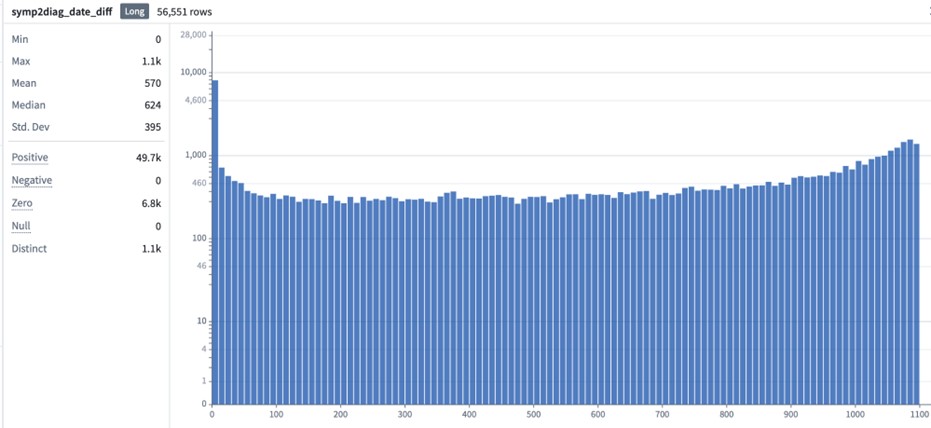


Figure S2 Plot from extracted data to calculate mean time between symptom start and diagnosis .
